# Supplementary material for: A low-tech, cost-effective and efficient method for safeguarding genetic diversity by direct cryopreservation of poultry embryonic reproductive cells
Source: eLife. 2022 Jan 25;11:e74036. doi: 10.7554/eLife.74036 (PMC8789256; doi:10.7554/eLife.74036)
Supplement: Figure 2—source data 1. [file elife-74036-fig2-data1.xlsx]

## Sheet: Figure 2A
No. of total cells/pair gonads
stage	age of embyo (days)	sex	embryo 1	embryo 2	embryo 3	embryo 4	embryo 5	embryo 6	embryo 7	embryo 8		AVERAGE		No.samples
35	9	F	174000	214000	389000							259000		3
35	9	M	120000	419000	452000	372000	372000	311000	324000			338000		7
36	10	F	1410000	253000	515000	513000						674000		4
36	10	M	270000	541000	585000							465333		3
37	11	F	757000	333000	216000	310000	366000	1630000	759000	864000		655000		8
37	11	M	889000	1030000	874000	718000	770000					857000		5
38	12	F	1540000	2290000	1540000	1830000	3330000	2840000	2010000	2420000		2230000		8
38	12	M	1330000	1140000	1330000	1200000						1250000		4
No. of germ cells/pair gonads
stage	age of embyo (days)	sex	embryo 1	embryo 2	embryo 3	embryo 4	embryo 5	embryo 6	embryo 7	embryo 8		AVERAGE		No.samples
35	9	F	848	7120	7120							5028.5		3
35	9	M	904	11700	22900	11600	10700	12500	11600			11545.8		7
36	10	F	18300	6100	12200	33900						17628		4
36	10	M	7120	8480	25400							13700		3
37	11	F	23400	43700	18800	30000	20800	64400	36500	55200		27357.3		8
37	11	M	14200	30300	15100	18700	25800					20823.1		5
38	12	F	254000	212000	102000	258000	220000	192000	86400	98300		209163		8
38	12	M	37300	40700	45800	17800						35383.1		4
% of germ cells in each gonad pair
stage	age of embyo (days)	sex	embryo 1 (%)	embryo 2 (%)	embryo 3 (%)	embryo 4 (%)	embryo 5 (%)	embryo 6 (%)	embryo 7 (%)	embryo 8 (%)		AVERAGE
35	9	F	0.5	3.3	1.8							1.9
35	9	M	0.8	2.8	5.1	3.1	2.9					2.9
36	10	F	1.3	2.4	2.4	6.6						3.2
36	10	M	2.6	1.6	4.34188							2.84729
37	11	F	3.1	13.1	8.7	9.7	5.7	3.9				8.1
37	11	M	1.6	2.9	1.7	2.6	3.4					2.4
38	12	F	16.5	9.2	6.6	14.1	6.6	6.7	4.3	4.1		10.6
38	12	M	2.8	3.6	3.5	1.5						2.8
