# Supplementary material for: A low-tech, cost-effective and efficient method for safeguarding genetic diversity by direct cryopreservation of poultry embryonic reproductive cells
Source: eLife. 2022 Jan 25;11:e74036. doi: 10.7554/eLife.74036 (PMC8789256; doi:10.7554/eLife.74036)
Supplement: Figure 2—source data 2. [file elife-74036-fig2-data2.xlsx]

## Sheet: Figure 2B
condition	genotype	days of incubation	stage	dissociation enzyme		No. of cells/pair gonads	sex
fresh gonadal tissues	GFP	9	HH35	dispase	24	170000	8F+16M
fresh gonadal tissues	RFP	9	HH35	gentle	3	330000	F
fresh gonadal tissues	GFP	9	HH35	gentle	3	220000	M
fresh gonadal tissues	GFP	9	HH35	dispase	6	230000	M
fresh gonadal tissues	GFP	9	HH35	dispase	4	170000	F
fresh gonadal tissues	RFP	9	HH35	dispase	6	100000	F
fresh gonadal tissues	CIA_HL	9	HH35	dispase	8	410000	4F+4M
fresh gonadal tissues	CIA_HL	9	HH35	dispase	21	550000	16F+7M
fresh gonadal tissues	GFP+RFP	9	HH35	dispase	21	200000	GFP (2M+11F)+RFP(4M+4F)
fresh gonadal tissues	GFP	9	HH35	dispase	19	100000	7F+12M
fresh gonadal tissues	CIA_HL	9	HH35	dispase	28	430000	11F+17M
fresh gonadal tissues	GFP	9	HH35	dispase	23	430000	12F+11M
fresh gonadal tissues	CIA_18	9	HH35	dispase	34	200000
fresh gonadal tissues	GFP+RFP	9	HH35	dispase	22	310000	GFP (8M+10F)+RFP(2M+2F)
fresh gonadal tissues	GFP	9	HH35	gentle	3	460000	F
fresh gonadal tissues	RFP	9	HH35	gentle	2	460000	M
fresh gonadal tissues	GFP	9	HH35	dispase	6	380000	M
fresh gonadal tissues	GFP+RFP	9	HH35	dispase	6	330000	M
fresh gonadal tissues	GFP+RFP	9	HH35	dispase	7	210000	M
fresh gonadal tissues	CIA_4	9	HH35	dispase	21	570000	9F+12M
fresh gonadal tissues	CIA_HL	9	HH35	dispase	33	440000	13F+20M
frozen gonadal tissues	GFP+RFP	9	HH35	dispase	7	210000	F (6 GFP+1 RFP)
frozen gonadal tissues	GFP+RFP	9	HH35	dispase	6	200000	M (5 GFP+1 RFP)
frozen gonadal tissues	GFP+RFP	9	HH35	dispase	9	310000	M (7 GFP+2 RFP)
frozen gonadal tissues	GFP+RFP	9	HH35	dispase	5	250000	M (4 GFP+1 RFP)
frozen gonadal tissues	GFP+RFP	9	HH35	dispase	6	100000	M (5 GFP+1 RFP)
frozen gonadal tissues	GFP+RFP	9	HH35	dispase	26	200000	F (20 GFP+6 RFP)
frozen gonadal tissues	GFP+RFP	9	HH35	dispase	13	77000	M (11 GFP+2 RFP)
frozen gonadal tissues	GFP+RFP	9	HH35	dispase	9	310000	M (5 GFP+4 RFP)
frozen gonadal tissues	RFP	9	HH35	dispase	7	270000	F
frozen gonadal tissues	GFP+RFP	9	HH35	dispase	7	280000	F (5 GFP+2 RFP)
frozen gonadal tissues	GFP+RFP	9	HH35	dispase	6	150000	M (3 GFP+3 RFP)
frozen gonadal tissues	GFP+RFP	9	HH35	dispase	6	430000	M (5 GFP+1 RFP)
frozen gonadal tissues	GFP+RFP	9	HH35	dispase	16	260000	F (11 GFP+5 RFP)
frozen gonadal tissues	GFP+RFP	9	HH35	dispase	12	180000	M (10 GFP+2 RFP)
frozen gonadal tissues	GFP+RFP	9	HH35	dispase	5	200000	M (4 GFP+1 RFP)
frozen gonadal tissues	GFP+RFP	9	HH35	dispase	6	470000	F (3 GFP+3 RFP)
frozen gonadal tissues	GFP+RFP	9	HH35	dispase	5	220000	M (4 GFP+1 RFP)
frozen gonadal tissues	GFP+RFP	9	HH35	dispase	6	300000	M (5 GFP+1 RFP)
frozen gonadal tissues	GFP+RFP	9	HH35	dispase	6	230000	M (5 GFP+1 RFP)
frozen dissociated gonadal cells	GFP	9	HH35	dispase	6	170000	6M
frozen dissociated gonadal cells	GFP+RFP	9	HH35	dispase	6	53000	3M+3F
frozen dissociated gonadal cells	GFP	9	HH35	dispase	6	57000	6M
frozen dissociated gonadal cells	GFP	9	HH35	dispase	3	80000	6M
frozen dissociated gonadal cells	GFP+RFP	9	HH35	dispase	8	97500	8F
frozen dissociated gonadal cells	GFP+RFP	9	HH35	dispase	6	20688.9	6M
frozen dissociated gonadal cells	GFP+RFP	9	HH35	dispase	7	52485.7	7F
frozen dissociated gonadal cells	GFP	9	HH35	dispase	4	125675	1F+3M
frozen dissociated gonadal cells	RFP	9	HH35	dispase	3	30000	2F+2M
frozen dissociated gonadal cells	GFP+RFP	9	HH35	dispase	4	114000	M
frozen dissociated gonadal cells	4GFP+4RFP	9	HH35	dispase	8	31500	F
frozen dissociated gonadal cells	3GFP+3RFP	9	HH35	dispase	6	64000	F
frozen dissociated gonadal cells	4GFP	9	HH35	dispase	4	87500	F
